1  
2  
3  
4  
5  
6  
7  
8  
9  
10

Variation in self-compatibility among genotypes and across ontogeny in a self-fertilizing  
vertebrate

Authors: Jennifer D. Gresham (Emory University) and Ryan L. Earley (University of Alabama)

Corresponding author: Jennifer D. Gresham, [jdgresham20@gmail.com](mailto:jdgresham20@gmail.com) and 256-998-1747

## Abstract

11  
12

13 Mixed mating strategies offer the benefits of both self-fertilizing one's own eggs (selfing) and  
14 outcrossing, while limiting the costs of both methods. The economics of mixed mating is further  
15 determined by individual self-compatibility. In gynodioecious (hermaphrodites, females) and  
16 androdioecious (hermaphrodites, males) species, the level of self-compatibility of the  
17 hermaphrodites also acts as a selection pressure on the fitness of the other sex. Mangrove rivulus  
18 fish populations are comprised of selfing hermaphrodites and males that result from  
19 hermaphrodites changing sex. Although hermaphrodites overwhelmingly reproduce through  
20 internal selfing, they occasionally oviposit unfertilized eggs. Males can externally fertilize these  
21 eggs. Here, we reveal that fecundity and self-compatibility varies within individuals across  
22 ontogeny until about 365 days post hatch, and among individuals derived from lineages that vary  
23 in their propensity to change sex. Hermaphrodites from high sex changing lineages were  
24 significantly less fecund and self-compatible than hermaphrodites from low sex changing  
25 lineages. These differences in self-compatibility and fecundity have the potential to drive  
26 evolutionary changes on mating strategy and the fitness of males in populations of the mangrove  
27 rivulus. This study also illustrates the importance of including lineage variation when estimating  
28 the costs and benefits of mixed mating strategies.

29

## Introduction

30           As a reproductive strategy, self-fertilization has many benefits. It overcomes the “cost of  
31 males,” wherein only one half of the population can produce offspring compared to the entire  
32 population in asexual or self-fertilizing species (Maynard Smith 1971, 1978). Self-fertilization  
33 also assures reproduction when pollinators and/or mates are scarce (Darwin 1876; Baker 1955;  
34 Stebbins 1957; Pannell et al. 2015), eliminates physical damage associated with mating and/or  
35 sexually transmitted parasites or pathogens (Fowler and Partridge 1989; Clutton-Brock and  
36 Parker 1995), and maintains well-adapted genotypes in stable environments (Allard et al. 1972;  
37 Dolgin et al. 2007). However, selection for selfing is often counteracted by selection for  
38 outcrossing. Benefits of outcrossing include combatting inbreeding depression in two ways: i)  
39 preventing accumulation of deleterious alleles in single genotypes, and ii) maintaining  
40 heterozygotes that may be more fit than homozygous individuals (Muller 1932). Ultimately,  
41 outcrossing represents a bet hedging strategy because it increases the variability of offspring  
42 fitness against a changing abiotic environment, or against coevolving parasites, predators and  
43 competitors (Muller 1932; Bell 1988; Lively 2010; Morran et al. 2011; Hartfield and Keightley  
44 2012).

45           Many plant and invertebrate species have evolved a mixed mating strategy of selfing and  
46 outcrossing. Mixed mating allows individuals and populations to reap the rewards of both  
47 strategies as biotic and abiotic factors change the fitness landscape across space and time.  
48 Because the fitness landscape is variable, it would be expected that self-compatibility also would  
49 vary both within and among populations due to changes in the magnitude and/or type of  
50 selection acting for and against selfing and outcrossing (Escobar et al. 2011). Plant populations  
51 that are often mate- and/or pollinator-limited at the range edge or in ephemeral habitats have

52 increased self-compatibility compared to other populations, as reported for the small angiosperm  
53 *Leavenworthia alabamica* (Busch 2005). Populations found near the center of the range and in  
54 more permanent habitats are much more likely to be self-incompatible (Busch 2005). When  
55 among-individual variation in self-compatibility is heritable, it provides the genetic and  
56 phenotypic background on which selection can drive evolutionary change in mating strategies.  
57 There are multiple examples of heritable variation in the self-compatibility of plants, including in  
58 the creeping bellflower, *Campanula rapunculoide* (Stephenson et al. 2000), and the Carolina  
59 horsenettle *Solanum carolinense* (Travers et al. 2004). Genetic and phenotypic variation in self-  
60 compatibility, along with environmental variability, can thus drive variation in mating strategy,  
61 as they alter the economics of selfing and outcrossing.

62 In mixed mating populations, self-compatibility can also vary across ontogeny, perhaps  
63 as a plastic response to environmental conditions. Individuals in populations that have higher  
64 rates of outcrossing often become more self-compatible with increasing age. This is often the  
65 result of selection favoring a “waiting” strategy for outcrossing opportunities when individuals  
66 are young, presumably to derive the benefits of variable and more fit progeny but also to assure  
67 some reproduction even if mates and/or pollinators are limited. This has been documented in  
68 plants (*Campanula rapunculoide*; Stephenson, Good, and Vogler 2000, *Solanum carolinense*;  
69 Travers, Mena-Ali, and Stephenson 2004), and snails (*Physa acute*; Tsitrone, Jarne, and David  
70 2003), but few other self-fertilizing species. Populations can also evolve different mating  
71 strategies based on age structure. If younger individuals are more populous, and mating  
72 opportunities are plentiful enough to make selfing unnecessary, age-dependent changes in self-  
73 compatibility may be lost so that little or no selfing occurs. Alternatively, if populations consist

74 predominantly of older individuals, selfing may continue to be an evolutionary stable component  
75 of a mixed mating strategy.

76           In androdioecious species, in which populations consist of hermaphrodites and males,  
77 variation in self-compatibility should also result in variation in the proportion of males within a  
78 population. Populations consisting of individuals with lower self-compatibility should maintain a  
79 higher proportion of males, as the “cost of males” is decreased by more outcrossing  
80 opportunities. Hypotheses concerning the evolution and variation of self-compatibility and  
81 mixed mating have been examined in many plant and invertebrate systems (Busch 2005; Winn et  
82 al. 2011; Wright et al. 2013), but not in a vertebrate species. Here we present evidence for  
83 individual variation in self-compatibility in one of only two vertebrates known to utilize a mixed  
84 mating strategy, the mangrove rivulus fish (*Kryptolebias marmoratus*).

85           The mangrove rivulus (hereafter “rivulus”), is a small euryhaline killifish that inhabits  
86 high elevation mangrove forests of Florida, the Bahamas, and Central America. Populations  
87 consist primarily of self-fertilizing hermaphrodites with varying proportions of males (no  
88 females). Rates of outcrossing and selfing also vary among populations and correlate with the  
89 proportion of males in the population; outcrossing rates increase as the proportion of males  
90 increase (Mackiewicz et al. 2006b; Tatarenkov et al. 2009). While self-fertilization happens  
91 internally, males can only achieve reproductive success if/when hermaphrodites lay unfertilized  
92 eggs, and there is no evidence that hermaphrodites outcross with each other (Furness et al. 2015).  
93 Rivulus males result from sex change, after which selfing hermaphrodites that make the sexual  
94 transition become obligate outcrossers. There also appears to be genetic variation for the  
95 propensity to change sex (Gresham et al. 2020, Turner 2006). Hermaphrodites fertilize the vast  
96 majority of their own eggs (> 94%, Harrington 1971, personal observations), giving males very

97 limited opportunities for reproductive success. Previously, it was reported that while individuals  
98 that change sex to male are significantly more likely to survive environmental challenges than  
99 those that remain hermaphrodite, they are much less likely to lay any eggs before sex change  
100 occurs (only 2 out of 180, Gresham et al. 2020). This presents the problem of how individuals  
101 that change sex might successfully pass their sex-changing alleles on to the next generation.

102 We hypothesized that the proportion of fertilized eggs (a measure of self-compatibility)  
103 would change with age and/or the propensity of a given lineage to change sex. First, we  
104 predicted that self-compatibility would increase with age. Cole and Noakes (1997) reported  
105 histological evidence that ovarian tissue matures before spermatogenic tissue. We predicted that  
106 there would be a period immediately after sexual maturity where oviposition of unfertilized eggs  
107 would be more likely. Second, we predicted that overall fecundity and/or self-compatibility  
108 would be greater in lineages that are more likely to change sex. This prediction is based on two  
109 competing ideas about how sex-changing alleles are successfully maintained in rivulus  
110 populations: i) selection should favor individuals in high sex changing lineages to be very fecund  
111 and self-compatible prior to changing sex, so as to compensate for any lost reproductive success  
112 after the transition, and/or ii) selection should favor individuals derived from lineages that  
113 change sex frequently to be highly fecund and self-compatible so that the siblings of sex  
114 changers recoup the lost reproductive success of their “brothers.”

115

116

## Methods

117 We designed and executed an experiment to measure the fecundity and self-compatibility  
118 of 213 individual fish representing 100 genetically distinct lineages (determined via  
119 microsatellite genotyping using 32 loci; (Mackiewicz et al. 2006a; Tatarenkov et al. 2010). We

120 calculated the propensity to change sex for each of the 100 lineages as the proportion of  
121 individuals in each lineage that transition from hermaphrodite to male under common garden  
122 conditions (Gresham et al. 2020), which ranged from 0 - 68.6%. All experimental fish were  
123 raised from hatching in individual plastic containers (Rubbermaid® Take-a-long Deep Squares)  
124 filled with approximately 200 mL 25‰ synthetic saltwater (prepared with Instant Ocean® sea  
125 salt and aged tap water) until 30 days post hatching (dph), at which time water volume was  
126 increased to 600 mL (25‰). At 60 dph, we suspended a large marble-sized ball of egg-laying  
127 substrate (Poly-fil®) from one top corner of the container. Beginning at 67 dph, each container  
128 was checked weekly for eggs in the substrate, around the top edge of the container, and on the  
129 bottom of the container. Fish were checked weekly for eggs until they changed sex to male or  
130 were 365-371 dph, ensuring that each remaining hermaphrodite was at least 365 dph and had  
131 been checked weekly 43 times.

132 Eggs were collected into 59 mL plastic cups (Fabri-Kal® Greenware GXL250PC) filled  
133 with approximately 6 mL 25‰ synthetic saltwater. Eggs were immediately counted and viewed  
134 under a stereomicroscope. Eggs were photographed and scored as either fertilized, unfertilized,  
135 or inviable. Fertilized and unfertilized eggs were identified by the presence or absence of a  
136 perivitelline space, respectively. Inviabile eggs were identified by their marked discoloration and  
137 opaque appearance (Figure 1). Unfertilized and inviable eggs were removed from the cup and  
138 discarded. Fertilized eggs were left in the cups, and water was replaced every 7 days. Cups were  
139 checked every day for hatchlings. Hatchlings from the experimental animals were then scored as  
140 alive or dead, with live hatchlings being euthanized in 4°C water. Experimental fish were also  
141 observed for signs of sex change each week when the tubs were checked for eggs, as described in  
142 (Scarsella et al. 2018); orange freckles or orange skin is the most reliable external character of

143 sex change. Individuals that changed sex (35 of the 213) were separated from the others and the  
144 date and age recorded. All experimental animals were isolated from the general colony for the  
145 duration of the experiment, kept on a 12h light: 12 h dark photoperiod, and fed a 4 mL  
146 suspension of brine shrimp (*Artemia*) nauplii (~2000 shrimp) six days per week. Room  
147 temperature was also maintained at  $26.45 \pm 1.6$  °C (mean  $\pm$  SEM). The University of  
148 Alabama Institutional Animal Care and Use Committee approved all procedures (IACUC  
149 Protocol #18-10-1644).

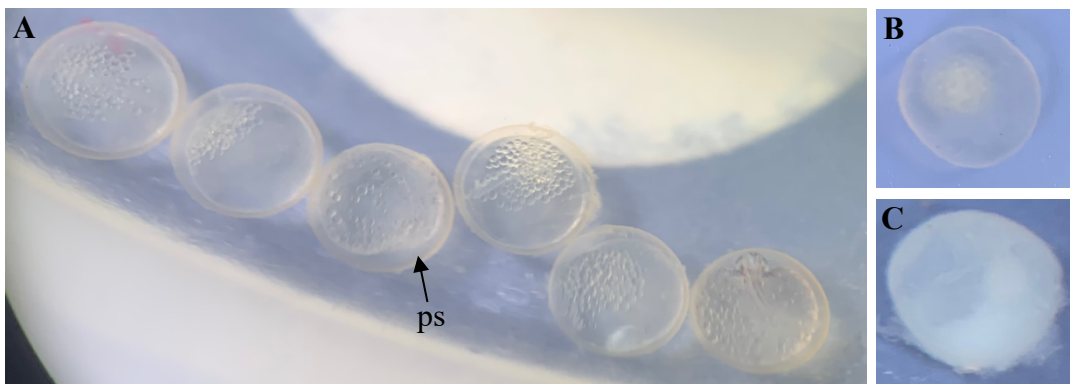

Figure 1. Scoring of eggs. Eggs were scored as A) fertilized, B) unfertilized, or C) inviable. Fertilized eggs were identified by the presence of the perivitelline space (ps). Unfertilized eggs lack the perivitelline space. Inviabile eggs were identified by their opaque or discolored appearance.

153

#### 154 *Fecundity and Self-compatibility Statistical Analysis*

155 We examined the relationship between fecundity (number of eggs laid) and both the  
156 propensity for a given lineage to change sex, and the individual's age. To determine whether  
157 fecundity varied as a function of the lineages' propensities to change sex, we first ran a nominal  
158 logistic model with 'laid eggs' as a categorical dependent variable (yes = 1, no = 0) and lineage  
159 sex change propensity as the independent variable. We used a general linear model to examine  
160 the relationship between total number of eggs laid (continuous, dependent) and lineage sex  
161 change propensity (independent). Residuals of the total number of eggs were left skewed, so we



162 transformed the number of eggs with square root ( $\sqrt{x+1}$ ). To determine whether fecundity (total  
163 number of eggs laid) varied as a function of age, we used a generalized regression model with a  
164 zero-inflated Poisson distribution and parent ID as a random effect to account for the fact that  
165 each parent was checked for eggs multiple times. An initial plot of the raw data suggested a  
166 possible non-linear relationship between age and fecundity so, we constructed linear, quadratic  
167 and cubic models and compared model fits using Akaike's Information Criterion (AIC). The  
168 linear, quadratic and cubic age terms were scaled by mean and standard deviation (i.e., z-score)  
169 prior to running the models. The cubic model fit best (Table 3.1), so we report the results of this  
170 model.

171 We modeled self-compatibility in two ways: by the proportion of eggs that were fertilized  
172 and by hatch success of fertilized eggs. To determine whether the proportion of fertilized eggs  
173 varied as a function of the lineages' propensity to change sex, we ran a general linear model. To  
174 determine whether the proportion of fertilized eggs varied as a function of the parents' age when  
175 the eggs were collected, we ran a general linear model with parent ID as a random effect. To  
176 determine whether the proportion of fertilized eggs varied as a function of the total number of  
177 eggs laid by each parent, we ran a general linear model. We calculated hatch success as the  
178 proportion of fertilized eggs that resulted in a live hatchling. To determine whether hatch success  
179 varied as a function of the lineages' propensity to change sex, we ran a general linear model.  
180 Models were run in JMP Pro version 15.0.0 (JMP®, Version 15 Pro 2019) and in RStudio using  
181 the glmmTMB package (RStudioTeam 2016; Brooks et al. 2017; R Core Team 2018). Data files  
182 will be deposited on GitHub upon publication acceptance.

183

184

185

## Results

186

187

188

189

190

191

192

193

194

195

196

197

198

199

200

201

202

203

204

205

206

207

The experiment included 213 individual fish from 100 different lineages. Thirty-five of those fish changed sex to male (16.4%) before the experiment ended at 365 - 371 dph. Of those 35, three individuals laid eggs first (9% of males, 1% of the total cohort). We collected 14,310 eggs, had 10,267 hatchlings (71.7% of eggs hatched), and 10,059 live hatchlings (98% of hatchlings were alive). The three individuals that changed sex to male laid a total of 69 eggs by 197 dph (the oldest age at which a fish was identified as male ), which equated to, on average,  $23 \pm 13$  (SEM) eggs per individual among the three, but  $1.97 \pm 1.4$  eggs per capita for all individuals that changed sex to male. The remaining 178 hermaphrodites laid a total of 7,341 eggs before they collectively aged to 197 dph ( $41.2 \pm 2.2$  eggs per individual). We started checking for eggs from each fish at 67 dph and collected a single egg from one individual on the first egg check; the egg was fertilized. Overall, the proportion of eggs that were fertilized was 93.4%. The proportion of eggs that were unfertilized was 2.5%, and the proportion identified as “inviable” was 4.1%.

Our results indicate that fecundity initially increases with age until about 175 dph, then decreases until it plateaus at about 350 dph (Table 1 Figure 2A). The proportion of fertilized eggs also increased significantly with age, but not the total fecundity of the parent (Table 1, Figure 2B). Because we did not record the hatch success of each individual collection (i.e., clutch) of eggs, we were not able to analyze whether hatch success changed with age. The lineages' propensity to change sex was significantly related to fecundity and self-compatibility. When individuals that changed sex to male were included in the model, the odds of laying any eggs decreased significantly as the propensity to change sex increased (Table 2). However, this relationship became non-significant when individuals that changed sex to male were excluded

208 (Table 2). Conversely, the number of eggs laid decreased significantly as the propensity to  
 209 change sex increased, whether or not males were included in the model (Table 2 Figure 3A).  
 210 Both the proportion of fertilized eggs and the hatch success of those eggs also decreased  
 211 significantly with increasing propensity to change sex (Table 2, Figure 3B, C).  
 212

2 Table 1. Summary of fecundity and self-compatibility models with age of parent fish as the dependent variable. AIC = Akaike's Information Criterion; ZI = zero inflation; F = F-ratio; P = P-value; Z = Z-value; df = degrees of freedom.

| <b>Fecundity</b>                                    |         |               |                                 |                          |        |         |
|-----------------------------------------------------|---------|---------------|---------------------------------|--------------------------|--------|---------|
| Models                                              | AICc    | $\Delta$ AICc | ZI parameter estimate (p-value) | Estimate                 | Z      | P       |
| # eggs ~ _age + age <sup>2</sup> + age <sup>3</sup> | 33140.0 | 0.0           | -0.98 (<0.0001)                 | age: 3.06                | 10.73  | <0.0001 |
|                                                     |         |               |                                 | age <sup>2</sup> : -5.76 | 9.85   | <0.0001 |
|                                                     |         |               |                                 | age <sup>3</sup> : 2.52  | 7.94   | <0.0001 |
| # eggs ~ _age + age <sup>2</sup>                    | 33198.5 | 58.5          | -0.92 (<0.0001)                 | age: 0.85                | 13.01  | <0.0001 |
|                                                     |         |               |                                 | age <sup>2</sup> : -1.14 | -17.67 | <0.0001 |
| # eggs ~ _age                                       | 33527.0 | 387.0         | -0.83 (<0.0001)                 | age: -0.29               | -29.58 | <0.0001 |

  

| <b>Proportion of fertilized eggs</b> |          |      |    |      |
|--------------------------------------|----------|------|----|------|
|                                      | Estimate | F    | df | P    |
| Parent Age                           | 0.000069 | 4.08 | 1  | 0.04 |
| Number of Eggs Laid                  | 0.000093 | 0.63 | 1  | 0.43 |

Table 2. Summary of fecundity, self-compatibility, and hatch success models with lineage sex change propensity as the dependent variable. Fecundity was square root (x+1) transformed to ensure normality. The models for proportion of fertilized eggs and hatch success already excluded the males that did not lay any eggs, thus separate models were not needed. Significant effects are shown in bold. F = F-ratio, P = P-value, df = degrees of freedom.

| <i>Probability of Laying Eggs</i>                     | <i>Odds Ratio</i> | $\chi^2$ | <i>df</i> | <i>P</i>          |
|-------------------------------------------------------|-------------------|----------|-----------|-------------------|
| Lineage sex change propensity, <b>including</b> males | 0.003             | 23.85    | 1         | <b>&lt;0.0001</b> |
| Lineage sex change propensity, <b>excluding</b> males | 0.006             | 2.62     | 1         | 0.11              |
| <i>Fecundity (# of eggs laid)</i>                     | <i>Estimate</i>   | <i>F</i> | <i>df</i> | <i>P</i>          |
| Lineage sex change propensity, <b>including</b> males | -4.17             | 36.29    | 1         | <b>&lt;0.0001</b> |
| Lineage sex change propensity, <b>excluding</b> males | -4.25             | 9.09     | 1         | <b>0.003</b>      |
| <i>Proportion of fertilized eggs</i>                  | <i>Estimate</i>   | <i>F</i> | <i>df</i> | <i>P</i>          |
| Lineage sex change propensity, <b>including</b> males | -0.10             | 4.86     | 1         | <b>0.029</b>      |
| <i>Hatch Success</i>                                  | <i>Estimate</i>   | <i>F</i> | <i>df</i> | <i>P</i>          |
| Lineage sex change propensity, <b>including</b> males | -0.36             | 33.85    | 1         | <b>&lt;0.0001</b> |

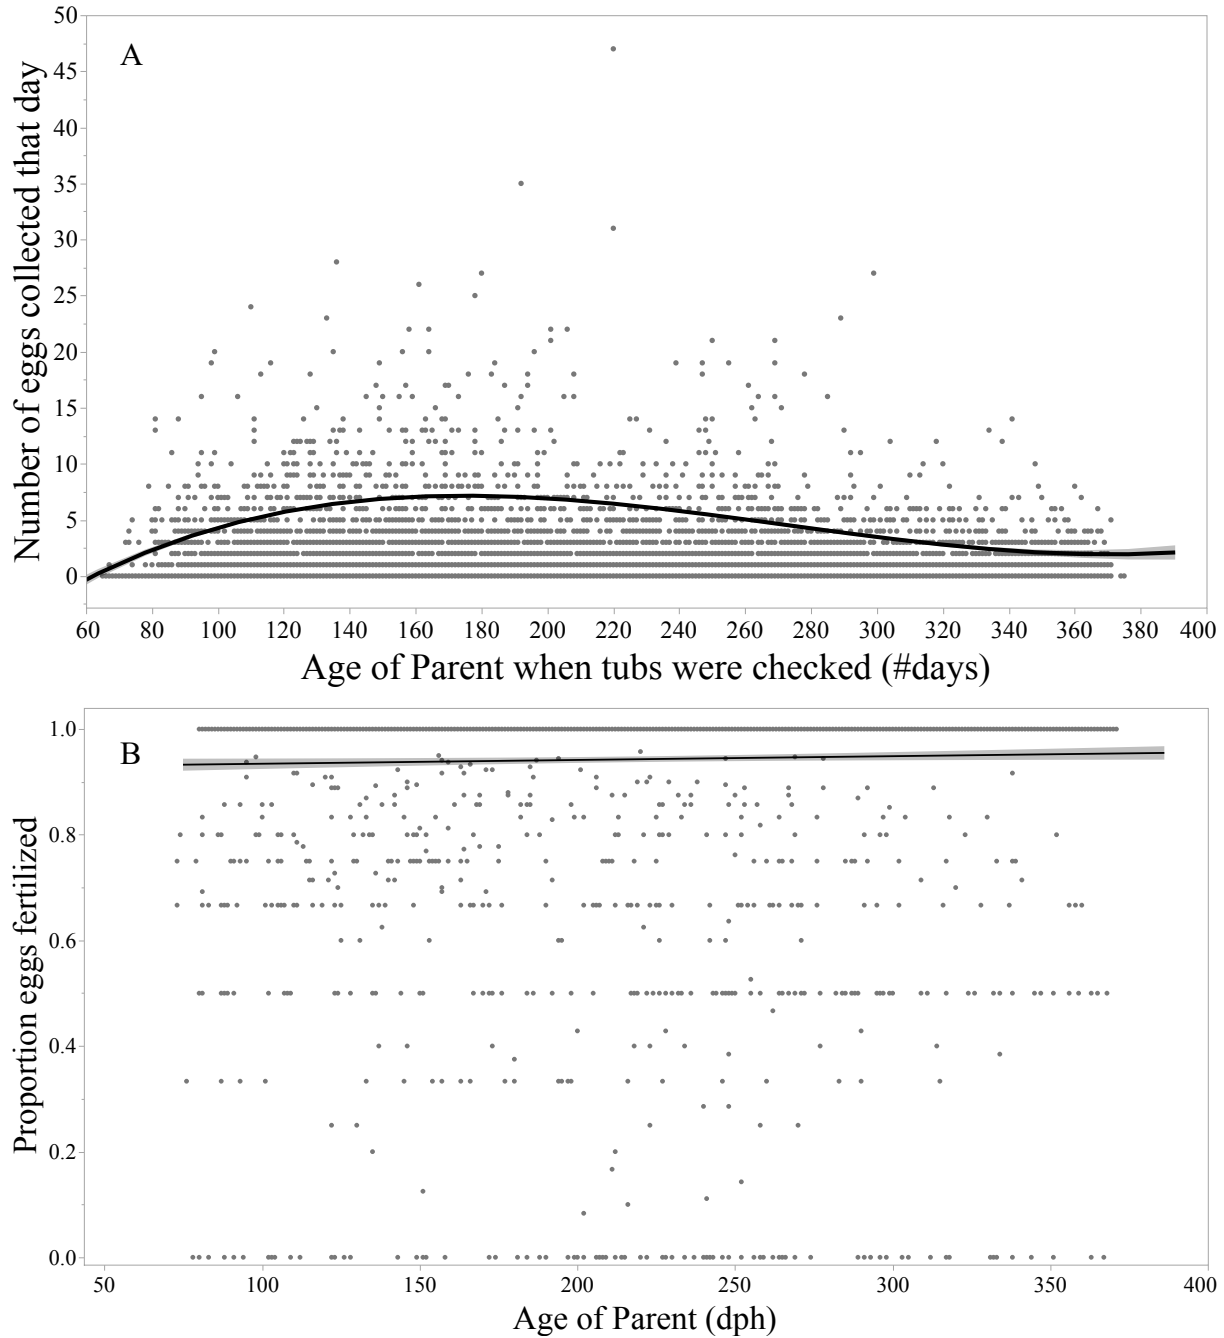

Figure 2. Age effects on the number of eggs collected and the proportion of those eggs that were fertilized. A) Age affected fecundity cubically; the number of eggs oviposited increased initially, then decreased between 170 – 180 dph, then plateaued around 350 dph. B) The proportion of eggs that were fertilized increased significantly with fish age. The additional straight line at the top of the graph is a string of points representing all of the egg collections where 100% of the eggs were fertilized.

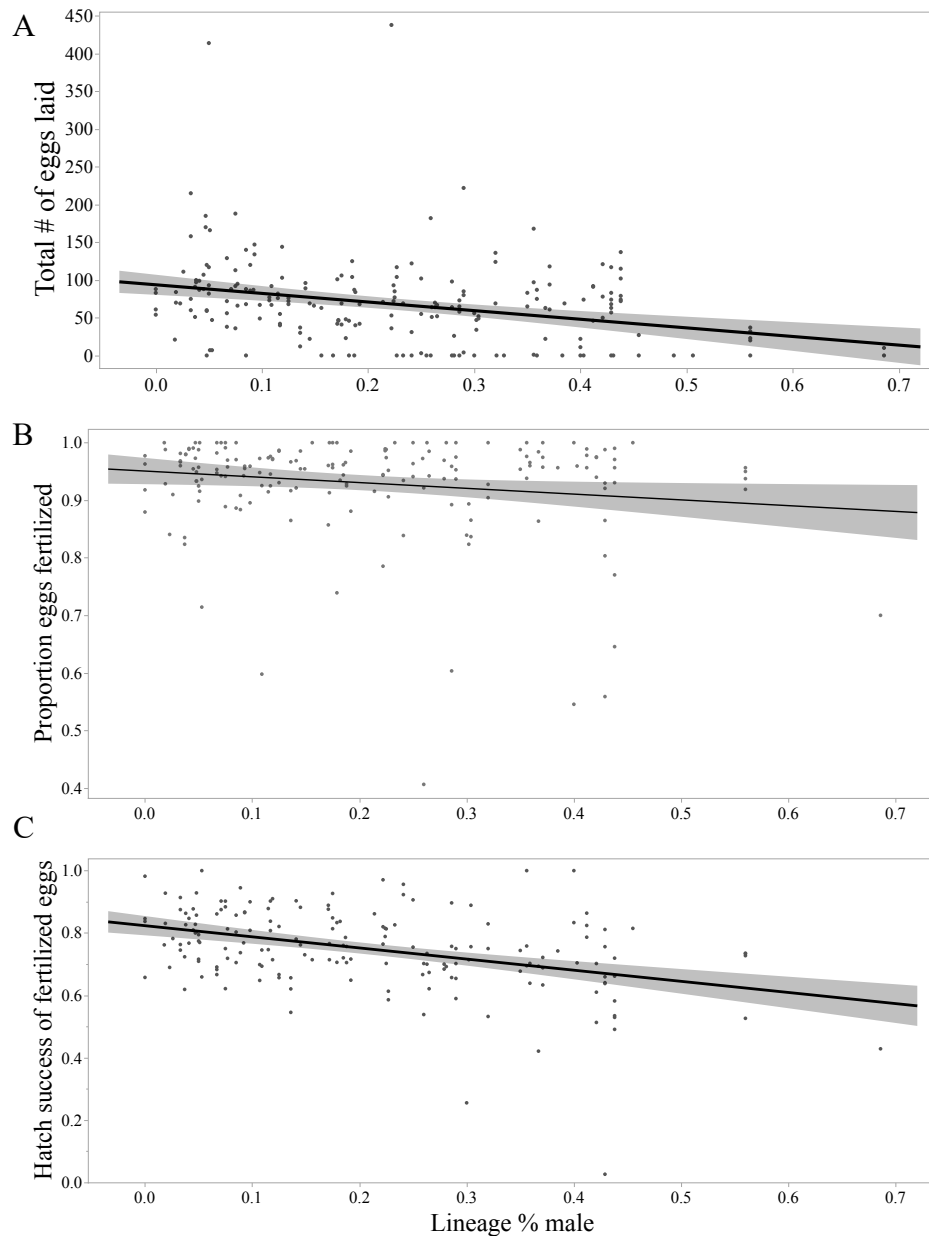

Figure 3. Lineage sex change propensity effects on A) fecundity, B) the proportion of eggs that were fertilized, and C) hatch success of fertilized eggs. Lineage sex change propensity is measured as the proportion of each lineage that change sex in isolation under common garden conditions in our colony (lineage % male).

204

## Discussion

205

Mixed mating strategies offer the fitness rewards of both outcrossing with conspecifics

206

and fertilizing one's own eggs. The cost-to-benefit ratio of each strategy is expected to vary

207

across space and time as the external and internal environments also change (Maynard Smith

208

1971; Lively and Lloyd 1990; Lehtonen et al. 2012; Layman et al. 2017; Lynch et al. 2018).

209

There is also variation among individuals in characters that affect mating strategy: fecundity and

210

self-compatibility (Stephenson et al. 2000; Travers et al. 2004; Busch 2005). Variation in self-

211

compatibility, combined with external factors such as pollinator and/or mate availability or

212

parasite pressure, has the potential to drive evolutionary changes in mating strategy. For instance,

213

if self-compatible individuals have greater reproductive fitness (produce more offspring and/or

214

offspring have greater survival rates) and survive just as well as self-incompatible individuals,

215

then the population may evolve to complete or near complete selfing. Comparatively, if there are

216

plenty of mates/pollinators and/or inbreeding depression that increases the benefits to cost ratio

217

of outcrossing, populations will evolve to complete or near complete outcrossing. We tested, in

218

the only self-fertilizing hermaphroditic vertebrate, the hypothesis that self-compatibility and

219

fecundity would vary with age and as a function of the lineages' propensities to change sex.

220

The most important finding was that both fecundity and self-compatibility decreased

221

as lineages became more likely to change sex, which is the exact opposite of what we predicted.

222

We predicted that fecundity and/or self-compatibility would increase with the lineages'

223

propensity to change sex for one of two reasons: either individuals that eventually change sex

224

would produce more eggs with greater self-compatibility, or the remaining hermaphrodites from

225

high sex changing lineages would produce at least as many eggs with equal self-compatibility as

226

those from lineages less likely to change sex. Given that neither of these predictions were

227 supported, it remains unclear how sex change from a self-fertilizing hermaphrodite to an obligate  
228 outcrossing male is maintained in rivulus populations. Theory suggests that males incur a cost  
229 because, when compared to self-fertilizing hermaphrodites, they cannot produce offspring and  
230 also reduce the parent's genetic contribution to offspring by one half (Maynard Smith 1971,  
231 1978). Males must overcome this cost by producing many extremely fit offspring.

232         Prior experiments have provided evidence of outbreeding depression on fecundity  
233 (Gresham et al. 2020) in several ecologically relevant conditions, increasing the cost of males  
234 and outcrossing. However, Ellison et al. (2011) provide evidence of potential inbreeding  
235 depression under parasitic stress, therefore decreasing the cost of males. Male size also increases  
236 with heterozygosity, possibly allowing more heterozygous males to secure more resources and  
237 have greater access to unfertilized eggs (Molloy et al. 2011). The results from this experiment  
238 suggest that the cost of being male is highly variable among lineages. Only three individuals laid  
239 eggs before changing sex to male, indicating that they were not as fecund as self-fertilizing  
240 hermaphrodites. The odds of laying any eggs decreased as sex change propensity increased when  
241 all individuals were included in the model. However, when we excluded individuals that changed  
242 sex, there was not an effect of lineage sex change propensity, demonstrating that the  
243 hermaphrodites from high sex changing lineages are just as likely to lay *an* egg as those from  
244 low sex changing lineages. In contrast, hermaphrodites from high sex changing lineages laid  
245 significantly fewer eggs, even if the males were excluded from the model. Self-compatibility and  
246 hatch success also decreased as propensity to change sex increased. These results indicate that  
247 individuals from high sex changing lineages that remain hermaphrodite are not very fecund or  
248 self-compatible. This exemplifies that the cost of changing sex to male might vary among



249 genetically distinct lineages. In particular, individuals from low sex changing, highly fecund and  
250 self-compatible lineages are likely to experience the highest cost of sex change.

251 We found that fecundity initially increases with age, then decreases, and finally plateaus  
252 as individuals age from about 60 dph to about 370 dph. The only other report of potential age-  
253 related changes in fecundity in rivulus comes from Harrington (1971). From 37 fish, he reported  
254 significant seasonality in “ovarian function” (i.e., fecundity) over three years when exposed to  
255 natural day light cycles, but not a significant change in fecundity with age. The seasonal decline  
256 reported by Harrington (1971), which occurred from September through December, aligns with  
257 the end of our experiment. The fish in our experiment hatched and then were removed from the  
258 experiment over a four-month period between 30 August 2018 and 22 December 2019. It is  
259 possible that the association between age and fecundity that we found, particularly the shallow  
260 decline in egg production from 180-300 dph represents the same seasonal decline described by  
261 Harrington (1971). He allowed his fish to experience natural daylight cycles. Our fish were kept  
262 on a constant photoperiod and a relatively constant temperature, and so should have been  
263 removed from any external signals of season. To truly understand how fecundity is affected by  
264 age and seasonality, we need additional years of records from multiple lineages.

265 Overall, 93.4% of the eggs we collected were fertilized. This is very close to the  
266 proportion of eggs fertilized reported by Harrington (1971). From six fish of one lineage and  
267 1,056 eggs, he identified 94.3% as fertilized. We recorded 2.5% unfertilized and 4.1% inviable,  
268 compared to Harrington (1971), who reported 4% unfertilized and 1.7% inviable. It is likely that  
269 most of the inviable eggs we recorded were unfertilized when oviposited, but then became  
270 inviable and discolored by the time we collected them. Harrington (1971) collected eggs every  
271 day and was more likely to record unfertilized eggs before they became inviable. Our first

272 fertilized egg was collected at 67 dph, indicating the egg was oviposited sometime between 60  
273 dph and 67 dph. This is the earliest reported oviposition in rivulus.

274           Regardless of the cost of changing sex to male, there is still the issue of passing sex  
275 changing alleles to the next generation. How do lineages that are less fecund, less self-  
276 compatible, and that frequently change sex to male not disappear from populations? It is possible  
277 that many of these lineages do go extinct but, some Belizean populations maintain relatively high  
278 male proportions (> 20%) and non-trivial rates of outcrossing (Davis 1990; Turner et al. 1992;  
279 Tatarenkov et al. 2009, 2015), which suggests that males and outcrossing are under positive  
280 selection in some places. Males must be able to successfully find unfertilized eggs, but we are  
281 not sure how that happens. There have been multiple attempts to mate males and hermaphrodites  
282 in the lab. Mackiewicz et al. (2006a) paired multiple nearly-senescent hermaphrodites and males  
283 in individual tubs and confirmed two out of 32 offspring were outcrossed progeny. Nakamura et  
284 al. (2008) surgically removed eggs from two hermaphrodites for *in vitro* outcrossing, but only  
285 one out of thirteen hatchlings were outcrossed instead of self-fertilized. Our laboratory has tried  
286 pairing hermaphrodites and males in different ratios with no outcrossing success. In behavior  
287 trials, reported interactions between pairs of hermaphrodites and males have ranged from no  
288 courtship behaviors (Martin 2007) to significantly more courtship behaviors than same sex pairs  
289 (Luke and Bechler 2010) or courtship behaviors by the males with reciprocal attacks by the  
290 hermaphrodites (Turner et al. 1992). It is clear that we have not yet reproducibly identified  
291 conditions that favor outcrossing.

292           There often are opposing selection pressures for and against biparental sex (outcrossing).  
293 Mixed mating individuals can benefit from outcrossing when the costs of biparental sex are low,  
294 but self when the costs of biparental sex are high or when mates and/or pollinators are sparse.

295 The relative benefit of selfing or outcrossing among individuals is also dependent on the  
296 individual level of self-compatibility, which can have a genetic basis and/or respond to the  
297 external environment in a plastic or flexible manner. Individuals and lineages that are not very  
298 self-compatible cannot exploit the benefits of selfing as much as individuals that are more self-  
299 compatible, even when the costs of outcrossing are high. In the mangrove rivulus fish, we have  
300 found significant variation in self-compatibility that correlates with age and with the lineages'  
301 propensities to change sex. Individuals from lineages with a higher sex change propensity laid  
302 significantly fewer eggs and a significantly lower proportion of the eggs were self-fertilized (i.e.,  
303 they were less self-compatible). Also, the proportion of fertilized eggs increased with age.

304 In wild populations, interactions between individuals' level of self-compatibility and  
305 external conditions have the potential to drive evolutionary changes. The internal and external  
306 environments can alter the age structure of populations and/or the economics of outcrossing and  
307 selfing. In populations that have few or no lineages that frequently change sex (such as those  
308 recently founded by highly self-compatible individuals), lineages with higher propensities to  
309 change sex would likely struggle to become established, if offspring of selfed and outcrossed  
310 matings are equally fit. In these populations, individuals that change sex frequently will find an  
311 environment with very few unfertilized eggs, and very few opportunities to pass their sex  
312 changing alleles on to the next generation. However, once high sex change propensity lineages  
313 become established, possibly due to additional migration or outcrossed progeny having a fitness  
314 advantage over selfed progeny, these lineages can maintain sex change and males. Indeed,  
315 among rivulus populations across the geographic range we find a significant increase in the rate  
316 of outcrossing that correlates with an increase in the proportion of sex changing lineages  
317 (Mackiewicz et al. 2006b; Tatarenkov et al. 2015). We also find variation among lineages within

318 in a population in the propensity to change sex, but the magnitude of variation is population  
319 specific (Gresham et al. 2020).

320 Males, and lineages that frequently produce males, may also have better success in  
321 populations with many young hermaphrodites. While we did not find evidence that younger  
322 hermaphrodites reproduce as “pure females” and only lay unfertilized eggs, younger  
323 hermaphrodites did lay more unfertilized eggs. If the fitness of progeny derived from selfing and  
324 outcrossing is relatively equal, population age structure can act as a selection pressure for or  
325 against lineages that frequently change sex. For instance, populations that lose a greater  
326 proportion of juveniles and young adults to predation will have proportionally fewer unfertilized  
327 eggs available for males than those populations in which younger individuals thrive; selecting  
328 against high sex changing lineages. These results open up fascinating opportunities for continued  
329 laboratory studies on lineage variation in traits such as size, fecundity, and sex change across  
330 different environments, and continued field studies to track demographic and population genetic  
331 characteristics such as selfing and outcrossing rates, the proportion of males, and population size  
332 and density.

333

334

## References

- 335 Allard, R. W., G. R. Babbel, M. T. Clegg, and a L. Kahler. 1972. Evidence for coadaptation in  
336 *Avena barbata*. Proceedings of the National Academy of Sciences of the United States of  
337 America 69:3043–8.  
338
- 339 Baker, H. 1955. Self-compatibility and establishment after “long-distance” dispersal. Evolution  
340 9:347–349.  
341
- 342 Bell, G. 1988. Recombination and the immortality of the germ line. Journal of Evolutionary  
343 Biology 1:67–82.  
344
- 345 Brooks, M. E., K. Kristensen, K. J. van Benthem, A. Magnusson, C. W. Berg, A. Nielsen, H. J.  
346 Skaug, et al. 2017. glmmTMB balances speed and flexibility among packages for zero-  
347 inflated generalized linear mixed modeling. The R Journal 9:378–400.  
348
- 349 Busch, J. W. 2005. The evolution of self-compatibility in geographically peripheral populations  
350 of *Leavenworthia alabamica* (Brassicaceae). American Journal of Botany 92:1503–1512.  
351
- 352 Clutton-Brock, T. H., and G. A. Parker. 1995. Sexual coercion in animal societies. Animal  
353 Behaviour 49:1345–1365.  
354
- 355 Cole, K. S., and D. L. G. Noakes. 1997. Gonadal development and sexual allocation in mangrove  
356 killifish, *Rivulus marmoratus* (Pisces: Atherinomorpha). Copeia 1997:596–600.  
357
- 358 Darwin, C. 1876. The effects of cross and self fertilisation in the vegetable kingdom. D.  
359 Appleton.  
360
- 361 Davis, W. P. 1990. Field observations of the ecology and habits of mangrove rivulus.  
362 Ichthyological Exploration of Freshwaters 1:123–134.  
363
- 364 Dolgin, E. S., B. Charlesworth, S. E. Baird, and A. D. Cutter. 2007. Inbreeding and outbreeding  
365 depression in *Caenorhabditis* nematodes. Evolution 61:1339–1352.  
366
- 367 Ellison, A., J. Cable, and S. Consuegra. 2011. Best of both worlds? association between  
368 outcrossing and parasite loads in a selfing fish. Evolution 65:3021–3026.  
369
- 370 Escobar, J. S., J. R. Auld, A. C. Correa, J. M. Alonso, Y. K. Bony, M. A. Coutellec, J. M. Koene,  
371 et al. 2011. Patterns of mating-system evolution in hermaphroditic animals: Correlations  
372 among selfing rate, inbreeding depression, and the timing of reproduction. Evolution  
373 65:1233–1253.  
374
- 375 Fowler, K., and L. Partridge. 1989. A cost of mating in female fruitflies. Nature 338:760–761.  
376
- 377 Furness, A. I., A. Tatarenkov, and J. C. Avise. 2015. A genetic test for whether pairs of  
378 hermaphrodites can cross-fertilize in a selfing killifish. Journal of Heredity 106:749–752.

- 379 Gresham, J. D., K. M. Marson, A. Tatarenkov, and R. L. Earley. 2020. Sex change as a survival  
380 strategy. *Evolutionary Ecology* 34:27–40.  
381
- 382 Harrington Jr, R. W. 1971. How ecological and genetic factors interact to determine when self-  
383 fertilizing hermaphrodites of *Rivulus marmoratus* change into functional secondary males,  
384 with a reappraisal of the modes of intersexuality among fishes. *Copeia* 1971:389–432.  
385
- 386 Hartfield, M., and P. D. Keightley. 2012. Current hypotheses for the evolution of sex and  
387 recombination. *Integrative Zoology* 7:192–209.  
388
- 389 JMP®, Version 15 Pro. 2019. SAS Institute Inc., Cary, NC.  
390
- 391 Layman, N. C., M. T. R. Fernando, C. R. Herlihy, and J. W. Busch. 2017. Costs of selfing  
392 prevent the spread of a self-compatibility mutation that causes reproductive assurance.  
393 *Evolution* 71:884–897.  
394
- 395 Lehtonen, J., M. D. Jennions, and H. Kokko. 2012. The many costs of sex. *Trends in Ecology &*  
396 *Evolution* 27:172–178.  
397
- 398 Lively, C. M. 2010. A review of Red Queen models for the persistence of obligate sexual  
399 reproduction. *Journal of Heredity* 101:S13–S20.  
400
- 401 Lively, C. M., and D. G. Lloyd. 1990. The cost of biparental sex under individual selection. *The*  
402 *American Naturalist* 135:489–500.  
403
- 404 Luke, K. N., and D. L. Bechler. 2010. The role of dyadic interactions in the mixed-mating  
405 strategies of the mangrove rivulus *Kryptolebias marmoratus*. *Current Zoology* 56:6–17.  
406
- 407 Lynch, Z. R., M. J. Penley, and L. T. Morran. 2018. Turnover in local parasite populations  
408 temporarily favors host outcrossing over self-fertilization during experimental evolution.  
409 *Ecology and Evolution*.  
410
- 411 Mackiewicz, M., A. Tatarenkov, A. Perry, J. R. Martin, J. F. Elder, D. L. Bechler, and J. C.  
412 Avise. 2006a. Microsatellite documentation of male-mediated outcrossing between  
413 inbred laboratory strains of the self-fertilizing mangrove killifish (*Kryptolebias*  
414 *marmoratus*). *The Journal of Heredity* 97:508–13.  
415
- 416 Mackiewicz, M., A. Tatarenkov, D. S. Taylor, B. J. Turner, and J. C. Avise. 2006b. Extensive  
417 outcrossing and androdioecy in a vertebrate species that otherwise reproduces as a self-  
418 fertilizing hermaphrodite. *Proceedings of the National Academy of Sciences of the*  
419 *United States of America* 103:9924–8.  
420
- 421 Martin, S. B. 2007. Association behaviour of the self-fertilizing *Kryptolebias marmoratus*  
422 (Poey): The influence of microhabitat use on the potential for a complex mating system.  
423 *Journal of Fish Biology* 71:1383–1392.  
424

- 425 Maynard Smith, J. 1971. What use is sex? *Journal of Theoretical Biology* 30:319–335.  
426
- 427 Maynard Smith, J. 1978. *The evolution of sex*. Cambridge Univ Press, Cambridge.  
428
- 429 Molloy, P. P., E. A. Nyboer, and I. M. Côté. 2011. Male-Male Competition in a Mixed-Mating  
430 Fish. *Ethology* 117:586–596.  
431
- 432 Morran, L. T., O. G. Schmidt, I. a Gelarden, R. C. Parrish, and C. M. Lively. 2011. Running with  
433 the Red Queen: host-parasite coevolution selects for biparental sex. *Science* (New York,  
434 N.Y.) 333:216–8.  
435
- 436 Muller, H. J. 1932. Some genetic aspects of sex. *American Society of Naturalists* 703:118–138.  
437
- 438 Nakamura, Y., K. Suga, Y. Sakakura, T. Sakamoto, and A. Hagiwara. 2008. Genetic and growth  
439 differences in the outcrossings between two clonal strains of the self-fertilizing mangrove  
440 killifish. *Canadian Journal of Zoology* 86:976–982.  
441
- 442 Pannell, J. R., J. R. Auld, Y. Brandvain, M. Burd, J. W. Busch, P. Cheptou, J. K. Conner, et al.  
443 2015. The scope of Baker’s law. *New Phytologist* 208:656–667.  
444
- 445 R Core Team. 2018. *R: A language and environment for statistical computing*. R Foundation for  
446 Statistical Computing, Vienna, Austria.  
447
- 448 RStudioTeam. 2016. *RStudio: Integrated Development for R*. RStudio, Inc., Boston.  
449
- 450 Scarsella, G. E., J. D. Gresham, and R. L. Earley. 2018. Relationships between external sexually  
451 dimorphic characteristics and internal gonadal morphology in a sex-changing fish.  
452 *Journal of Zoology* 305:133–140.  
453
- 454 Stebbins, G. L. 1957. Self fertilization and population variability in the higher plants. *The*  
455 *American Naturalist* 91:337.  
456
- 457 Stephenson, A. G., S. V Good, and D. W. Vogler. 2000. Interrelationships among inbreeding de-  
458 pression, plasticity in the self-incompatibility system, and the breeding system of  
459 *Campanula rapunculoides* L. (Campanulaceae). *Annals of Botany* 85:211–219.  
460
- 461 Tatarenkov, A., R. L. Earley, B. M. Perlman, D. S. Taylor, B. J. Turner, and J. C. Avise. 2015.  
462 Genetic subdivision and variation in selfing rates among Central American populations of  
463 the mangrove rivulus, *Kryptolebias marmoratus*. *Journal of Heredity* 106:276–284.  
464
- 465 Tatarenkov, A., S. M. Q. Lima, D. S. Taylor, and J. C. Avise. 2009. Long-term retention of self-  
466 fertilization in a fish clade. *Proceedings of the National Academy of Sciences of the*  
467 *United States of America* 106:14456–14459.  
468  
469  
470

- 471 Tatarenkov, A., B. C. Ring, J. F. Elder, D. L. Bechler, and J. C. Avise. 2010. Genetic  
472 composition of laboratory stocks of the self-fertilizing fish *Kryptolebias marmoratus*: a  
473 valuable resource for experimental research. *PloS one* 5:e12863.  
474
- 475 Travers, S. E., J. Mena-Ali, and A. G. Stephenson. 2004. Plasticity in the self-incompatibility  
476 system of *Solanum carolinense*. *Plant Species Biology* 19:127–135.  
477
- 478 Tsitrone, A., P. Jarne, and P. David. 2003. Delayed Selfing and Resource Reallocations in  
479 Relation to Mate Availability in the Freshwater Snail *Physa acuta*. *American Naturalist*  
480 162:474–488.  
481
- 482 Turner, B. J., W. P. Davis, and D. S. Taylor. 1992. Abundant males in populations of a selfing  
483 hermaphrodite fish, *Rivulus marmoratus*, from some Belize cays. *Journal of Fish Biology*  
484 40:307–310.  
485
- 486 Winn, A. A., E. Elle, S. Kalisz, P. Cheptou, C. G. Eckert, C. Goodwillie, M. O. Johnston, et al.  
487 2011. Analysis of inbreeding depression in mixed-mating plants provides evidence for  
488 selective interference and stable mixed mating. *Evolution* 65:3339–3359.  
489
- 490 Wright, S. I., S. Kalisz, and T. Slotte. 2013. Evolutionary consequences of self-fertilization in  
491 plants. *Proceedings. Biological sciences / The Royal Society* 280:20130133.  
492
